# Supplementary material for: Sequencing Angiosperm Plastid Genomes Made Easy: A Complete Set of Universal Primers and a Case Study on the Phylogeny of Saxifragales
Source: PubMed Central journal article supplement — Genome Biol Evol. 2013 Apr 17;5(5):989–97. doi: 10.1093/gbe/evt063 (PMC3673619; doi:10.1093/gbe/evt063), 2013-04-17
Supplement: supp_evt063_Supplementary_figures.pdf [file supp_evt063_Supplementary_figures.pdf]

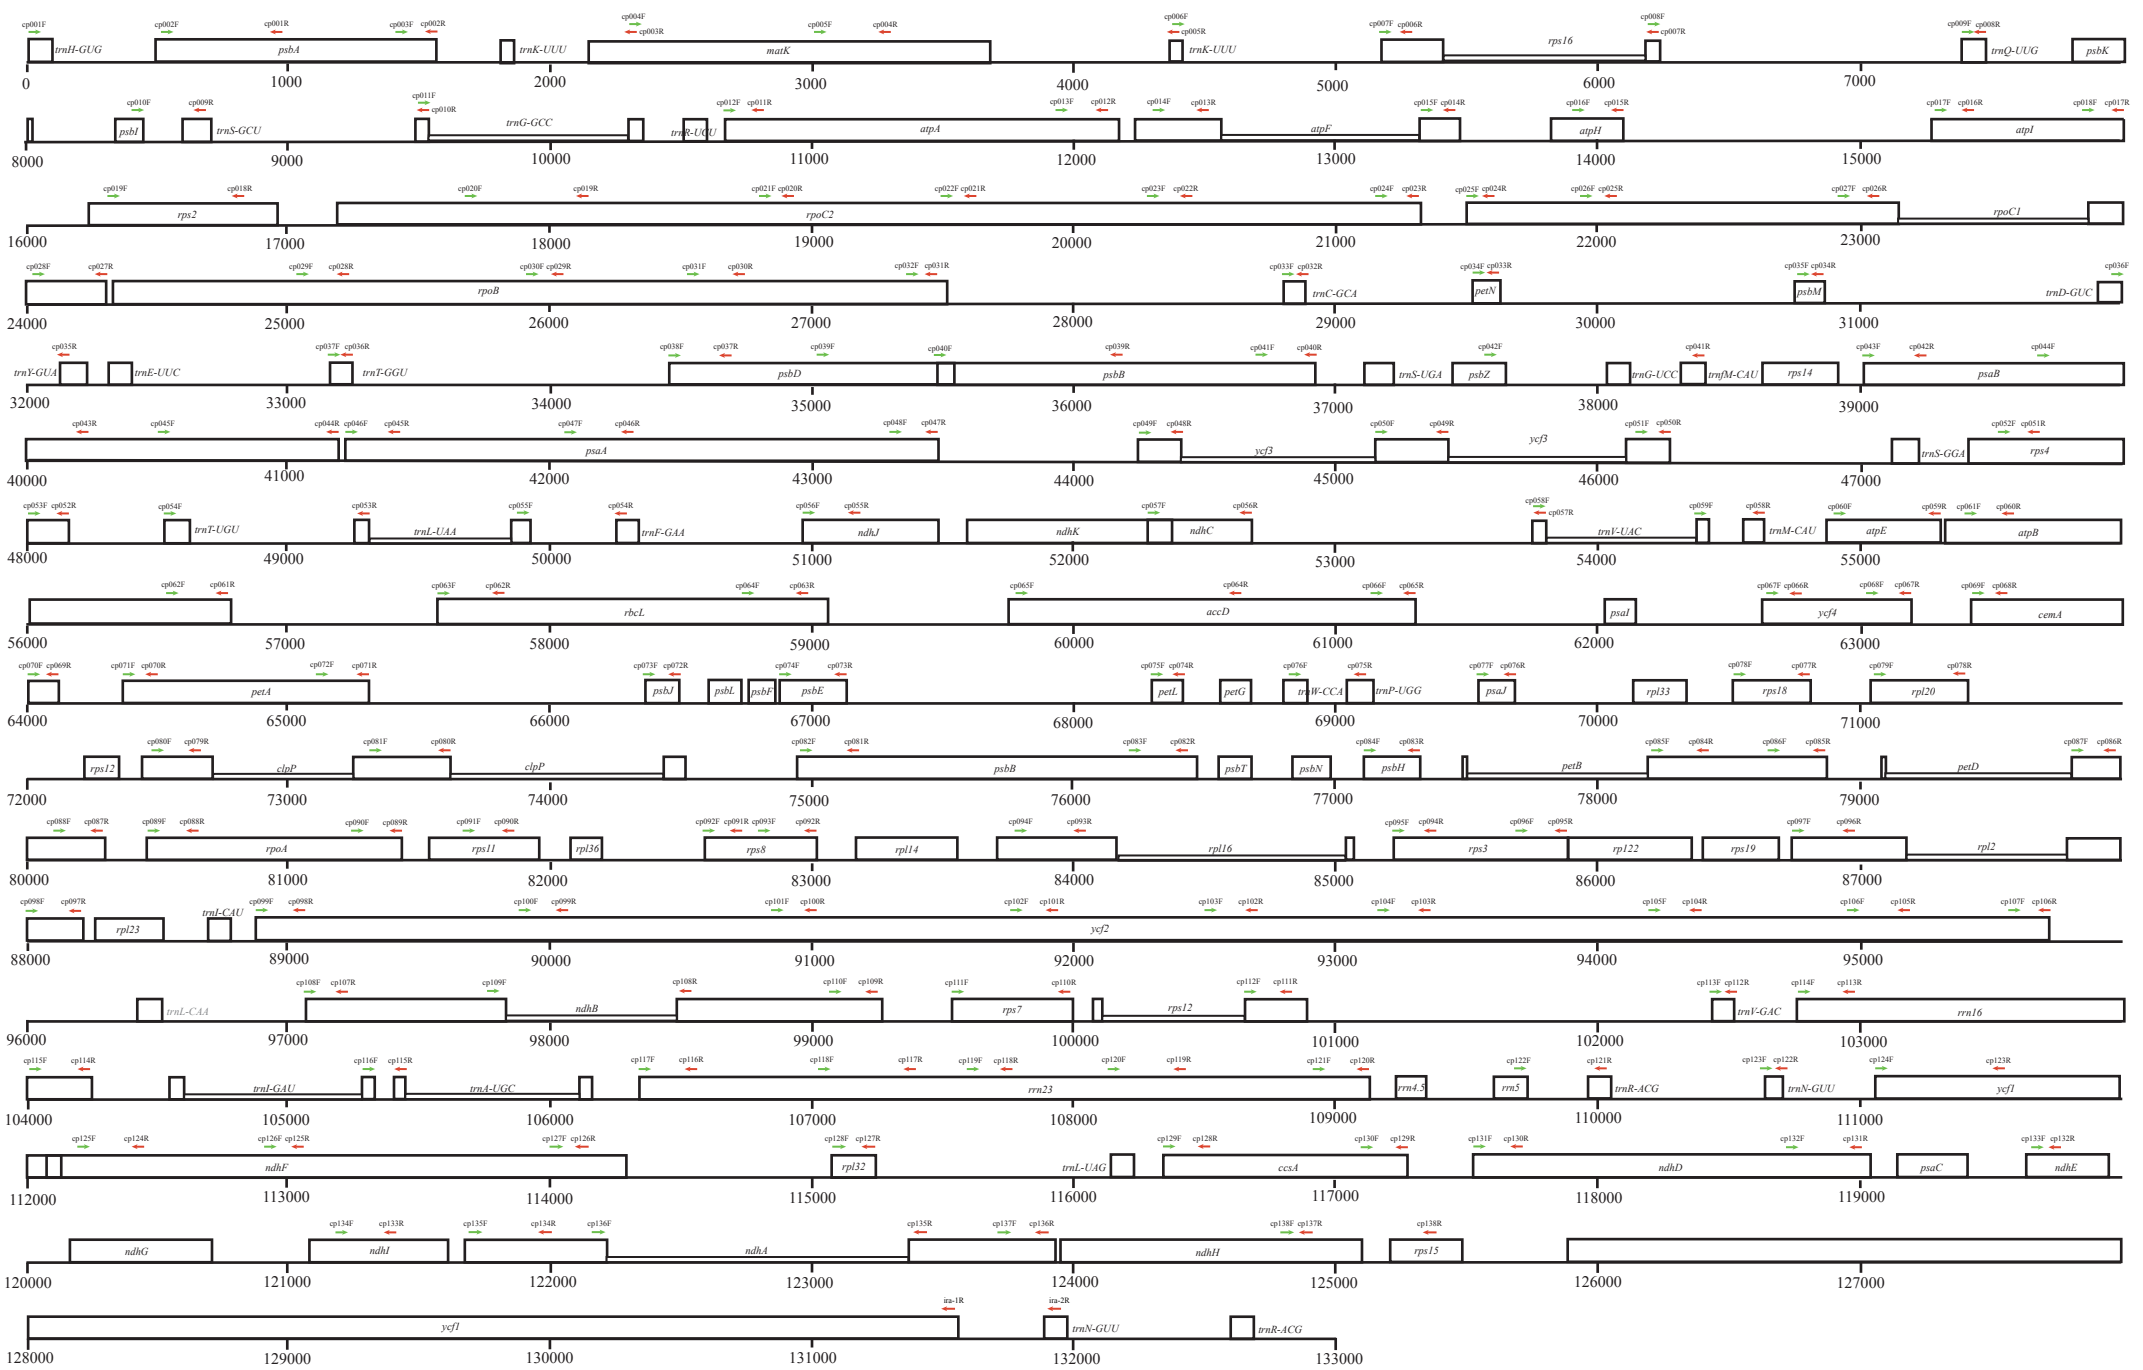

Supplementary fig. S1. Priming sites of 138 universal primer pairs in a plastid genome.

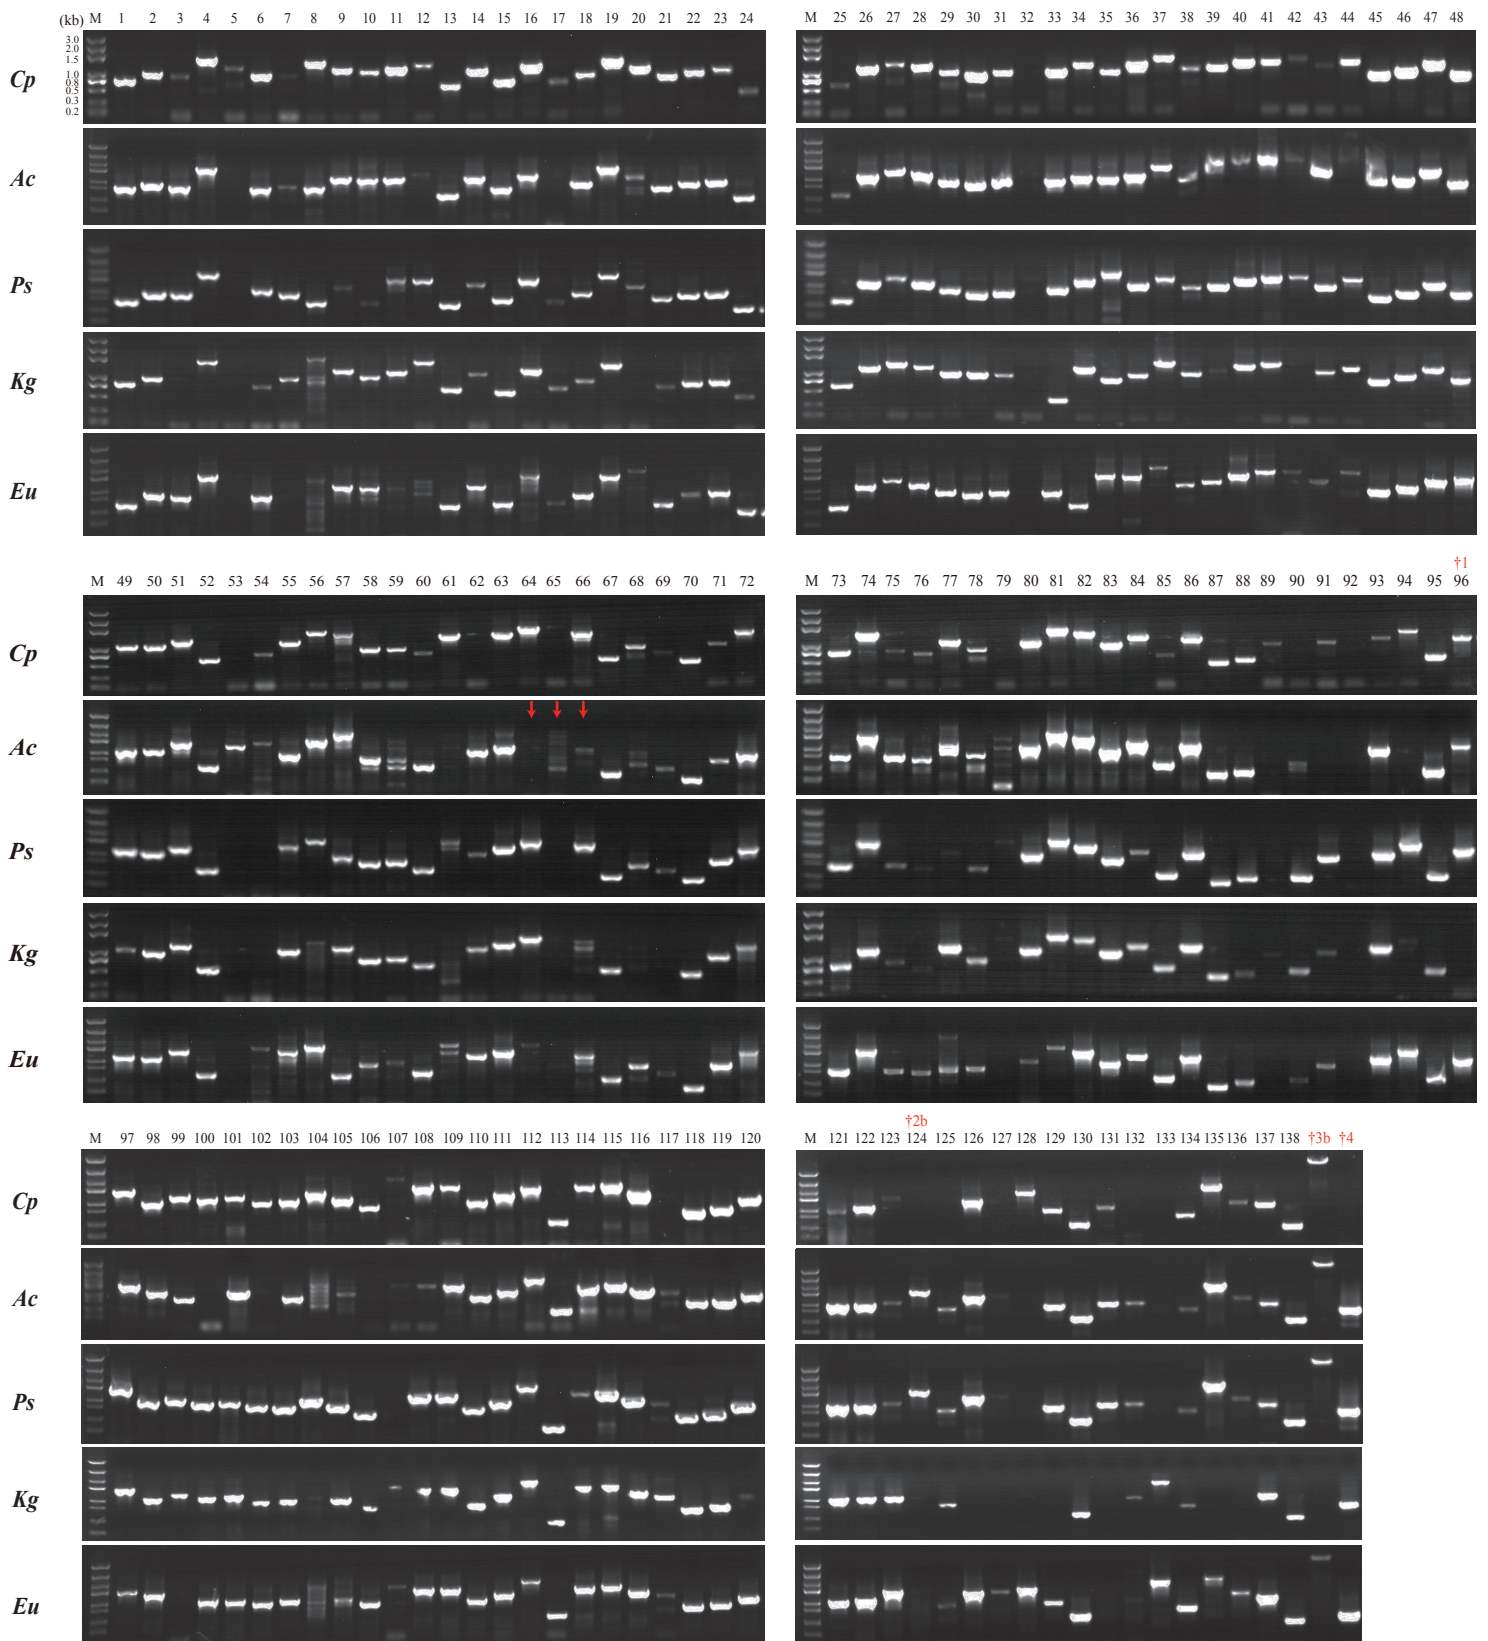

Supplementary fig. S2. PCR gel profiles of five plant species unsequenced. *Cp*: *Chimonanthus praecox*, *Ac*: *Acorus calamus*, *Ps*: *Prunus serrulata*, *Kg*: *Keiskea glandulosa*, and *Eu*: *Eucommia ulmoides*. ↓ indicates gene loss. † indicates a single-copy inverted repeat boundary region.

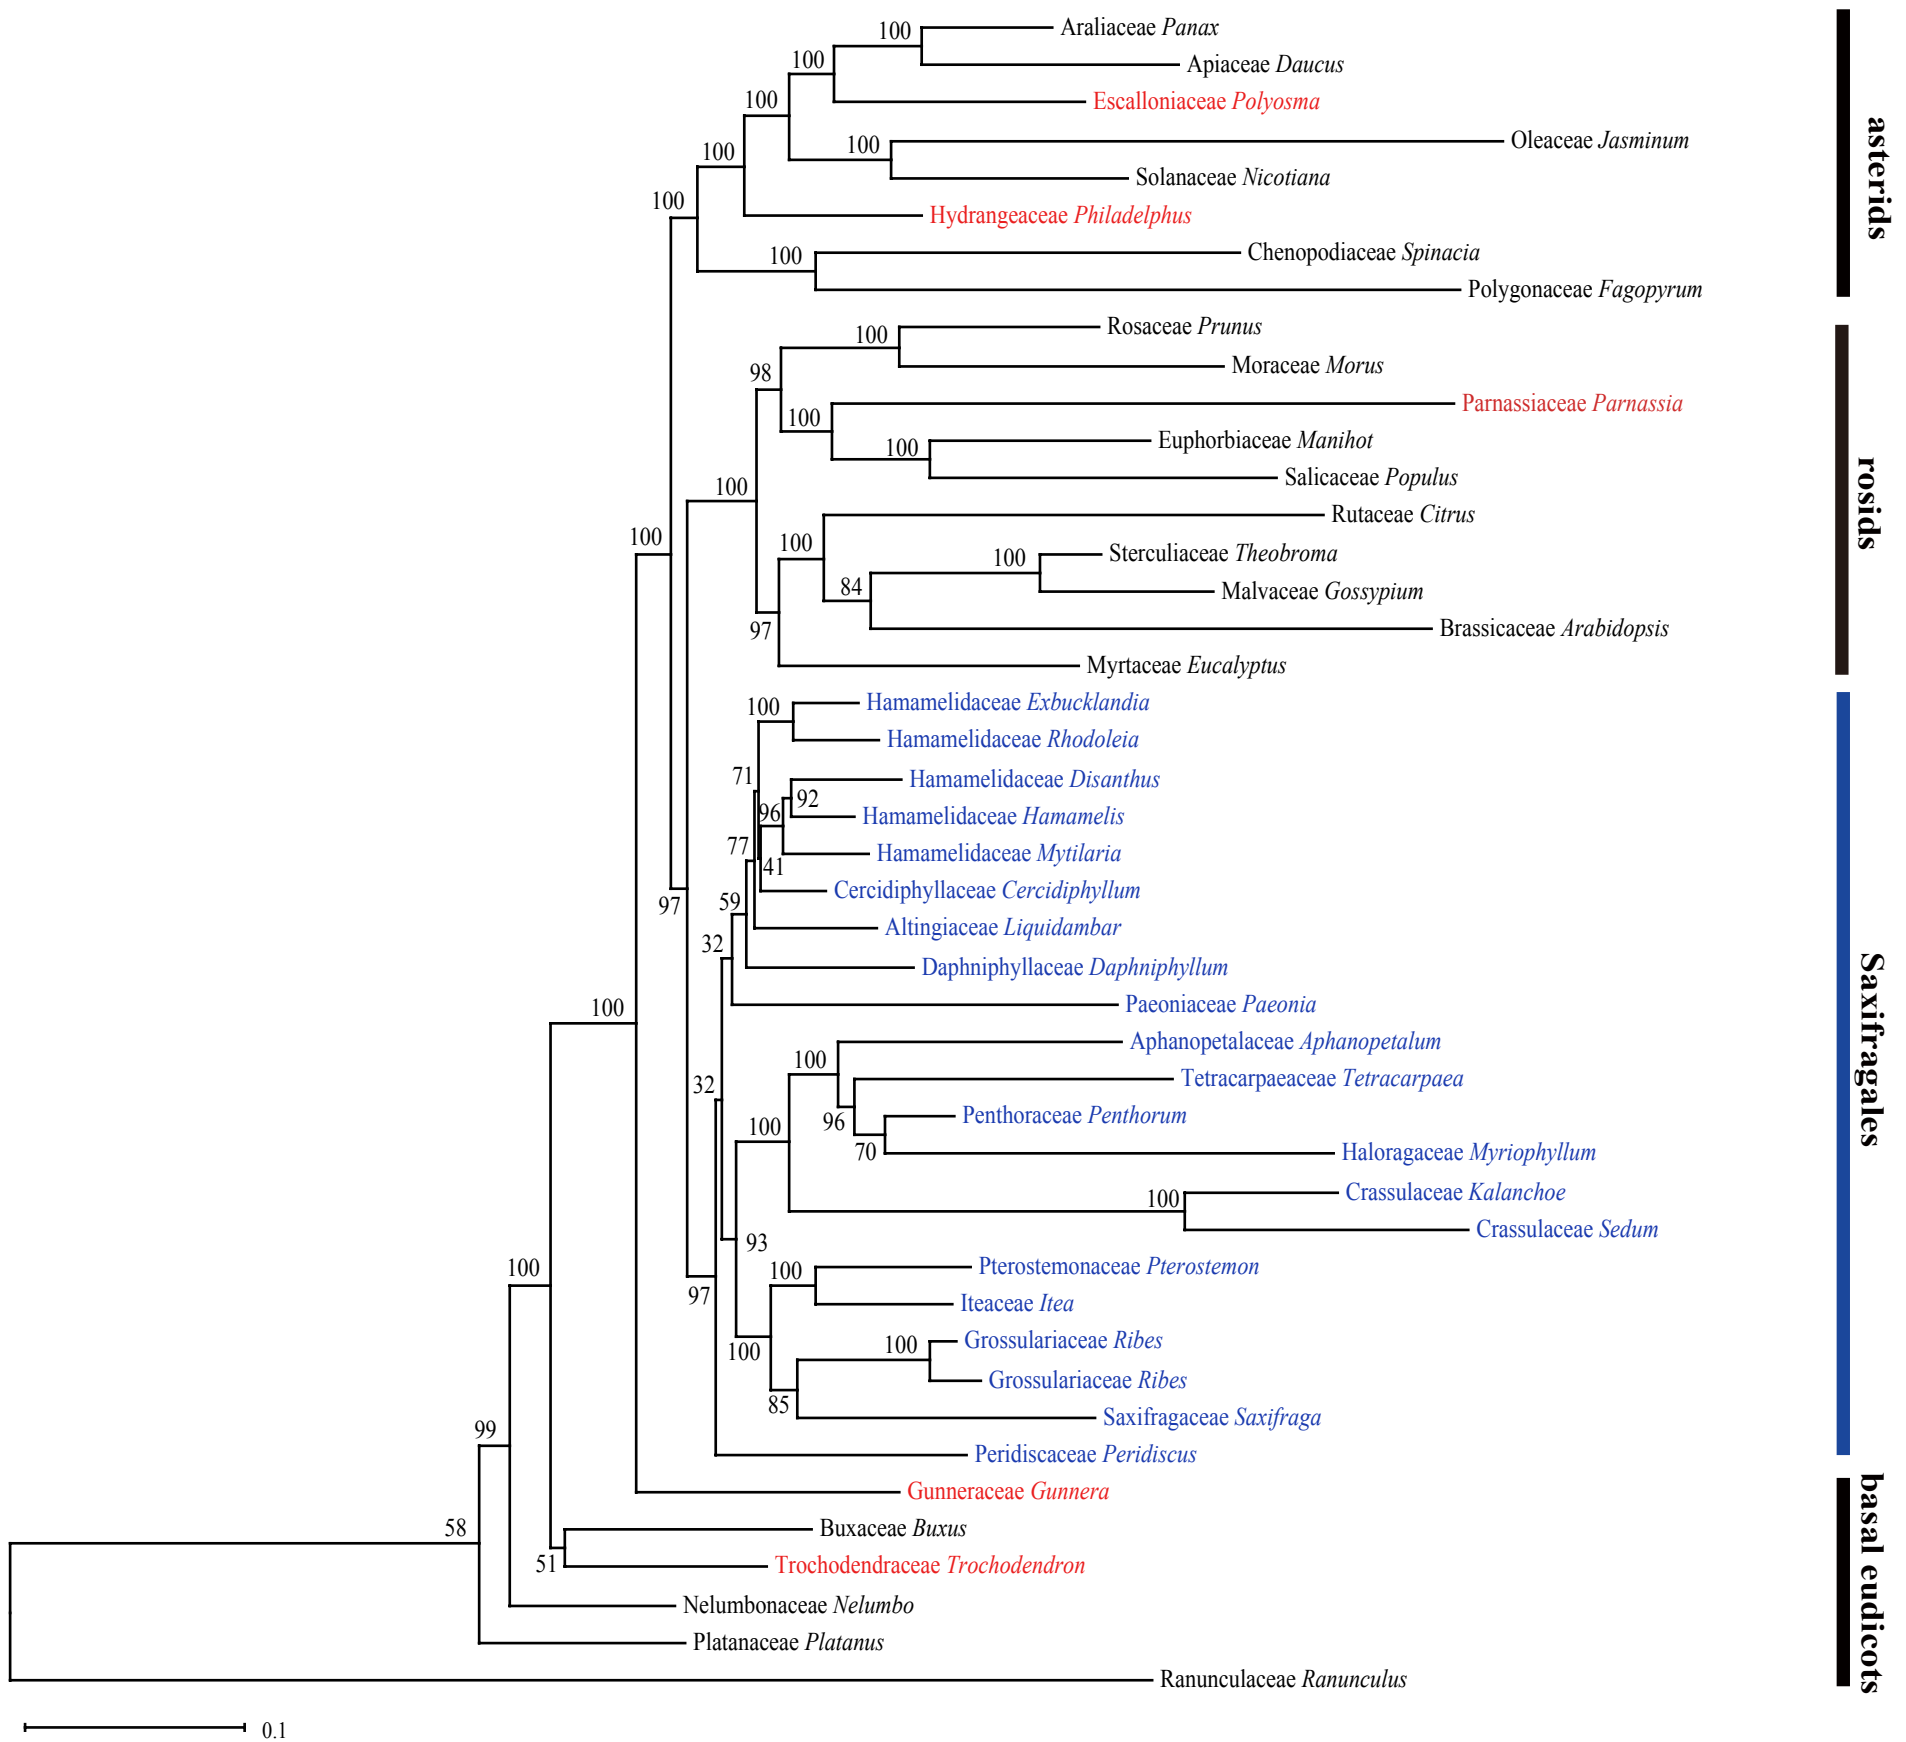

Supplementary fig. S3. Phylogram of the bootstrap consensus ML tree based on the amino acid sequences of 18 chloroplast regions with 1,804 parsimony- informative sites from a total length of 9,562 amino acids. Numbers associated with branches are bootstrap supports.
